# Supplementary material for: Highly effective transformation of methyl phenyl carbonate to diphenyl carbonate with recyclable Pb nanocatalyst
Source: Royal Society of Chemistry journal article supplement (doi:10.1039/c9ra03931g), 2019-01-01
Supplement: c9ra03931g1.pdf [file c9ra03931g1.pdf]

## **Highly effective transformation of methyl phenyl carbonate to diphenyl carbonate with recyclable Pb nanocatalyst**

Songlin Wang <sup>a,b</sup>, Hongying Niu <sup>a</sup>, Jianji Wang <sup>b</sup>, Tong Chen <sup>c,\*</sup>, Gongying Wang <sup>c</sup>,  
Jiamin Zhang <sup>a</sup>

<sup>a</sup> School of Chemistry and Chemical Engineering, Henan Institute of Science and Technology, Xinxiang 453003, China

<sup>b</sup> Postdoctoral Programs, Key Laboratory of Green Chemical Media and Reactions, Ministry of Education, School of Chemistry and Chemical Engineering, Henan Normal University, Xinxiang 453007, China

<sup>c</sup> Chengdu Institute of Organic Chemistry, Chinese Academy of Sciences, Chengdu 610041, China

Corresponding author. E-mail: chentongw@sina.com.cn (T. Chen)

**Table S1** The content of Pb in the fresh and used catalysts.

| Catalyst                           | PbO content (wt. %) |                   |
|------------------------------------|---------------------|-------------------|
|                                    | Fresh               | Used <sup>a</sup> |
| PbO/MgO                            | 9.86                | 9.61              |
| PbO/ZrO <sub>2</sub>               | 9.49                | 9.40              |
| PbO/SiO <sub>2</sub>               | 9.93                | 8.84              |
| PbO/Al <sub>2</sub> O <sub>3</sub> | 9.88                | 8.65              |
| PbO/TiO <sub>2</sub>               | 9.63                | 8.40              |

<sup>a</sup> After the third reused catalyst.

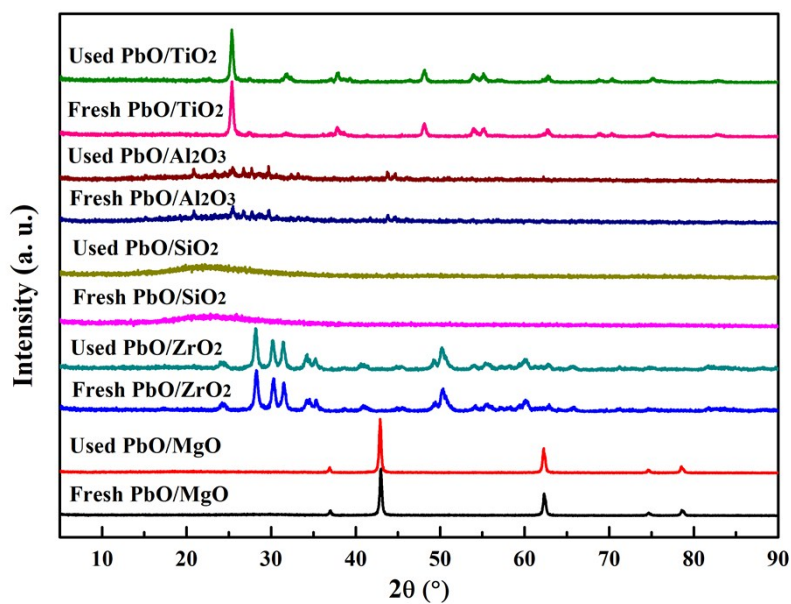

**Fig. S1.** XRD patterns of fresh and recovered catalysts after the third use.
